# Supplementary material for: Quality-of-Life Measures in Children and Adults With Type 1 Diabetes: Juvenile Diabetes Research Foundation Continuous Glucose Monitoring randomized trial
Source: PubMed Central journal article supplement — Diabetes Care. 2010 Aug 9;33(10):2175–7. doi: 10.2337/dc10-0331 (PMC2945155; doi:10.2337/dc10-0331), 2010-08-09
Supplement: supp_dc10-0331_dc100331Onlineappendiix.pdf [file supp_dc10-0331_dc100331Onlineappendiix.pdf]

## Online Appendix 1

**Supplementary On-Line Table 1. Baseline and 26 Week Values for Quality of Life Measures for the CGM Group Stratified by CGM Use in Month 6 of the Trial**

|                                                |    | CGM Use $\geq$ 6 days/week in Month 6 |                 |                 | CGM Use $<$ 6 days/week in Month 6 |                 |                 |                 |
|------------------------------------------------|----|---------------------------------------|-----------------|-----------------|------------------------------------|-----------------|-----------------|-----------------|
|                                                |    | Enrollment                            | 26 weeks        | Difference*     | Enrollment                         | 26 Weeks        | Difference*     |                 |
|                                                | N† | Mean $\pm$ SD                         | Mean $\pm$ SD   | Mean $\pm$ SD   | N†                                 | Mean $\pm$ SD   | Mean $\pm$ SD   | Mean $\pm$ SD   |
| <b>Participants <math>\geq</math>18 years</b>  |    |                                       |                 |                 |                                    |                 |                 |                 |
| HFS-Total score ‡                              | 78 | 37.8 $\pm$ 12.6                       | 33.6 $\pm$ 11.7 | -4.2 $\pm$ 8.7  | 42                                 | 37.1 $\pm$ 13.3 | 32.9 $\pm$ 11.3 | -4.3 $\pm$ 12.8 |
| HFS-Worry subscale §                           | 78 | 31.3 $\pm$ 18.5                       | 26.4 $\pm$ 16.5 | -5.0 $\pm$ 11.3 | 42                                 | 28.7 $\pm$ 17.7 | 23.3 $\pm$ 14.6 | -5.4 $\pm$ 14.4 |
| HFS-Behavior subscale                          | 78 | 46.2 $\pm$ 10.9                       | 43.0 $\pm$ 10.7 | -3.2 $\pm$ 9.6  | 42                                 | 48.1 $\pm$ 11.3 | 45.3 $\pm$ 12.3 | -2.8 $\pm$ 12.4 |
| PAID ¶                                         | 78 | 22.5 $\pm$ 13.7                       | 17.1 $\pm$ 12.9 | -5.4 $\pm$ 9.9  | 42                                 | 23.7 $\pm$ 18.0 | 20.0 $\pm$ 16.2 | -3.7 $\pm$ 13.0 |
| SF-12-PCS #                                    | 78 | 53.8 $\pm$ 5.2                        | 55.8 $\pm$ 4.5  | +2.0 $\pm$ 6.0  | 42                                 | 54.7 $\pm$ 7.2  | 55.1 $\pm$ 5.7  | +0.4 $\pm$ 5.8  |
| SF-12-MCS **                                   | 78 | 49.5 $\pm$ 7.7                        | 48.3 $\pm$ 10.6 | -1.3 $\pm$ 10.3 | 42                                 | 49.2 $\pm$ 9.6  | 48.8 $\pm$ 9.4  | -0.4 $\pm$ 8.2  |
| <b>Participants <math>&lt;</math> 18 years</b> |    |                                       |                 |                 |                                    |                 |                 |                 |
| HFS-Worry Subscale §                           | 43 | 24.9 $\pm$ 15.2                       | 18.8 $\pm$ 11.8 | -6.1 $\pm$ 12.0 | 60                                 | 26.3 $\pm$ 17.8 | 22.3 $\pm$ 13.9 | -4.0 $\pm$ 12.6 |
| PedsQL Generic††                               | 43 | 80.8 $\pm$ 11.5                       | 83.9 $\pm$ 11.0 | +3.2 $\pm$ 11.5 | 59                                 | 76.9 $\pm$ 13.1 | 78.1 $\pm$ 12.8 | +0.9 $\pm$ 9.0  |
| PedsQL Diabetes-Specific‡‡                     | 43 | 84.3 $\pm$ 11.6                       | 85.1 $\pm$ 10.4 | +0.9 $\pm$ 8.3  | 59                                 | 80.6 $\pm$ 12.5 | 79.1 $\pm$ 14.0 | -1.8 $\pm$ 10.8 |
| <b>Parents§§</b>                               |    |                                       |                 |                 |                                    |                 |                 |                 |
| HFS-Worry subscale §                           | 45 | 42.1 $\pm$ 13.9                       | 37.0 $\pm$ 13.9 | -5.2 $\pm$ 13.3 | 62                                 | 40.8 $\pm$ 17.5 | 37.0 $\pm$ 15.2 | -3.5 $\pm$ 13.2 |
| Parent-PAID¶¶                                  | 45 | 48.6 $\pm$ 12.3                       | 47.0 $\pm$ 13.2 | -1.6 $\pm$ 13.2 | 62                                 | 45.1 $\pm$ 14.8 | 47.3 $\pm$ 12.4 | +2.6 $\pm$ 13.2 |
| PedsQL Generic††                               | 45 | 74.9 $\pm$ 11.1                       | 77.3 $\pm$ 13.4 | +2.4 $\pm$ 11.1 | 62                                 | 77.9 $\pm$ 12.2 | 76.4 $\pm$ 12.1 | -1.6 $\pm$ 10.9 |
| PedsQL Diabetes-specific‡‡                     | 45 | 75.3 $\pm$ 11.0                       | 77.9 $\pm$ 11.2 | +2.6 $\pm$ 11.6 | 62                                 | 76.3 $\pm$ 12.9 | 75.4 $\pm$ 11.9 | -1.4 $\pm$ 12.3 |

† None of the p values from the ANCOVA comparing the difference after 26 weeks for the regular users ( $\geq$  6 days/week) vs. the less frequent users ( $<$  6 days/week) were  $<$ 0.05.

\* These analyses were limited to subjects or parents who completed both baseline and 26-week questionnaires.

‡ Hypoglycemia Fear Survey (HFS) average score of all items giving equal weight to each item. Scale 0-100 with higher score denoting more fear or more likely to avoid low blood glucose.

§ HFS Worry subscale. Scale 0-100 with higher score denoting more fear.

|| HFS Behavior subscale. Scale 0-100 with higher score denoting more likely to avoid low blood glucose.

¶ Problem Areas in Diabetes Scale (PAID). Scale 0-100 with higher score denoting more problems.

# Social Functioning SF-12 version 2 Health Survey (SF-12) - Physical Component Summary (PCS). Norm based score with higher score denoting better functioning.

\*\* SF-12 - Mental Component Summary (MCS). Norm based score with higher score denoting better functioning.

†† Pediatric Quality of Life (PedsQL) Survey Generic Core Scales (Emotional, Social, and School functioning subscales). Scale 0-100 with higher score denoting higher quality of life.

‡‡ PedsQL Survey Type 1 Diabetes Module (Treatment Barriers, Treatment Adherence, and Worry subscales). Scale 0-100 with higher score denoting higher quality of life.

§§ Parents refer to parents of participants <18 years of age.

*The JDRF Continuous Glucose Monitoring Study Group*

*Clinical Centers:* Listed in order of number of patients enrolled with clinical center name, city, and state. Personnel are listed as (PI) for Principal Investigator, (I) for co-Investigator and (C) for Coordinators:

*Diabetes Care Center, University of Washington, Seattle, WA:* Irl B. Hirsch, M.D. (PI); Lisa K. Gilliam, M.D., Ph.D. (I); Kathy Fitzpatrick, R.N., M.N., C.D.E. (C); Dori Khakpour, R.D., C.D., C.D.E. (C); *Department of Pediatrics, Yale University School of Medicine, New Haven, CT:* Stuart A. Weinzimer, M.D. (PI); William V. Tamborlane, M.D. (I); Brett Ives, M.S.N., A.P.R.N. (C); Joan Bosson-Heenan (C); *Adult Section, Joslin Diabetes Center, Boston, MA:* Howard Wolpert, M.D. (PI); Greeshma Shetty, M.D. (I); Astrid Atakov-Castillo (C); Judith Giusti, M.S., R.D., L.D.N., C.D.E. (C); Stacey O'Donnell, R.N., C.D.E. (C); Suzanne Ghiloni, R.N., C.D.E. (C); *Atlanta Diabetes Associates, Atlanta, GA:* Bruce W. Bode, M.D. (PI); Kelli O'Neil, C.D.E. (C); Lisa Tolbert, R.N., M.N., C.D.E. (C); *Nemours Children's Clinic, Jacksonville, FL:* Tim Wysocki, Ph.D. (co-PI); Larry A. Fox, M.D. (co-PI); Nelly Mauras, M.D. (I); Kimberly Englert, R.N. (C); Joe Permuy, M.S.N., A.R.N.P. (C); *Division of Pediatric Endocrinology and Diabetes, Stanford University, Stanford, CA:* Bruce Buckingham, M.D. (PI); Darrell M. Wilson, M.D. (I); Jennifer Block, R.N., C.D.E. (C); Kari Benassi, R.N., N.P. (C); *Department of Pediatrics, University of Iowa Carver College of Medicine, Iowa City, IA:* Eva Tsalikian, M.D. (PI); Michael Tansey, M.D. (I); Debra Kucera, A.R.N.P., C.P.N.P. (C); Julie Coffey, A.R.N.P., C.P.N.P. (C); Joanne Cabbage (C); *Pediatric Adolescent, and Young Adult Section, Joslin Diabetes Center, Boston, MA:* Lori Laffel, M.D., M.P.H., (PI), Kerry Milaszewski, R.N., C.D.E. (C); Katherine Pratt (C); Elise Bismuth, M.D., M.S., (C); Joyce Keady, M.S.N., C.P.N.P. (C); Margie Lawlor, M.S., C.D.E. (C); *Barbara Davis Center for Childhood Diabetes, University of*

*Colorado, Denver, CO:* H. Peter Chase, M.D. (PI); Rosanna Fiallo-Scharer, M.D. (I); Paul Wadwa, M.D. (I); Laurel Messer, R.N., C.D.E. (C); Victoria Gage, R.N. (C); Patricia Burdick (C); *Departments of Pediatric Endocrinology and Research and Evaluation, Kaiser Permanente, San Diego and Pasadena, CA:* Jean M. Lawrence, Sc.D., M.P.H., M.S.S.A. (co-PI); Robert Clemons, M.D. (co-PI); Michelle Maeva, R.N., C.D.E. (C); Bonnie Sattler, M.S., R.D. (C); *Coordinating Center:* Jaeb Center for Health Research, Tampa, FL: Roy W. Beck, M.D., Ph.D.; Katrina J. Ruedy, M.S.P.H.; Craig Kollman, Ph.D.; Dongyuan Xing, M.P.H.; Judy Sibayan, M.P.H.; *University of Minnesota Central Laboratory:* Michael Steffes, M.D., Ph.D., Jean M. Bucksa, C.L.S., Maren L. Nowicki, C.L.S., Carol Van Hale, C.L.S., Vicky Makky, C.L.S. *Cost-effectiveness investigators: National Opinion Research Center, University of Chicago:* Michael O'Grady, Ph.D.; Elbert Huang, M.D., M.P.H.; Anirban Basu, Ph.D.; David O. Meltzer, M.D., Ph.D.; Lan Zhao, Ph.D. *University of Michigan:* Joyce Lee, M.D., M.P.H. *Juvenile Diabetes Research Foundation, Inc.:* Aaron J. Kowalski, Ph.D. *Operations Committee:* Lori Laffel, M.D., M.P.H. (co-chair), William V. Tamborlane, M.D. (co-chair), Roy W. Beck, M.D., Ph.D., Aaron J. Kowalski, Ph.D., Katrina J. Ruedy, M.S.P.H. *Data and Safety Monitoring Board:* Ruth S. Weinstock, M.D., Ph.D. (chair), Barbara J Anderson, Ph.D.; Davida Kruger, M.S.N., A.P.R.N.; Lisa LaVange, Ph.D.; Henry Rodriguez, M.D.
